# Supplementary material for: Exploring Core Genes by Comparative Transcriptomics Analysis for Early Diagnosis, Prognosis, and Therapies of Colorectal Cancer
Source: MDPI journal article supplement (doi:10.3390/cancers15051369), 2023-02-21
Supplement: s1 [file s1]

## Supplementary File

# Exploring core genes by comparative transcriptomics analysis for early diagnosis, prognosis and therapies of colorectal-cancer

Md. Ariful Islam<sup>1</sup>, Md. Bayazid Hossen<sup>1</sup>, Md. Abu Horaira<sup>1</sup>, Md Alim Hossen<sup>1</sup>, Md. Kaderi Kibria<sup>1</sup>, Md. Selim Reza<sup>1</sup>, Khanis Farhana Tuly<sup>1</sup>, Md. Omar Faruqe<sup>2</sup>, Firoz Kabir<sup>3</sup>, Rashidul Alam Mahumud<sup>4\*</sup> and Md. Nurul Haque Mollah<sup>1\*</sup>

<sup>1</sup> Bioinformatics Lab, Department of Statistics, University of Rajshahi, Rajshahi-6205, Bangladesh

<sup>2</sup> Department of Computer Science and Engineering, University of Rajshahi, Rajshahi-6205, Bangladesh

<sup>3</sup> Department of Ophthalmology and Visual Sciences, School of Medicine, University of Maryland, Baltimore, MD 21201, USA

<sup>4</sup> NHMRC Clinical Trials Centre, Faculty of Medicine and Health, The University of Sydney, Camperdown, NSW 2006, Australia

\*Corresponding Author: Md. Nurul Haque Mollah (E-mail: mollah.stat.bio@ru.ac.bd)

| Tables/Figures | Captions/Legends                                                                                                                                                                  | Pages |
|----------------|-----------------------------------------------------------------------------------------------------------------------------------------------------------------------------------|-------|
| Figure S1      | Box plots for the expressions of KGs with different stages (Stage 1, Stage 2, Stage 3, and Stage 4) of READ (Rectal adenocarcinoma) including the control stage in TCGA database. | 2     |
| Figure S2      | Core genes-set enrichment analysis with different diseases                                                                                                                        | 3     |
| Figure S3      | Pan-cancer analysis of core genes (A) AURKA, (B) CDC20, (C) CDK1, (D) CDKN3, (E) CKS2, (F) MAD2L1, (G) MELK, (H) PTTG1, (I) TOP2A, (J) TPX2                                       | 4-7   |
| Table S1       | Transcriptome-guided 158 meta-drug agents associated with CRC infections collected from DSigDB online database.                                                                   | 8     |
| Table S2       | The list of top 20 significantly ( $p$ -value<0.05) comorbidities associated with CGs                                                                                             | 9     |
| Reference      |                                                                                                                                                                                   | 9     |

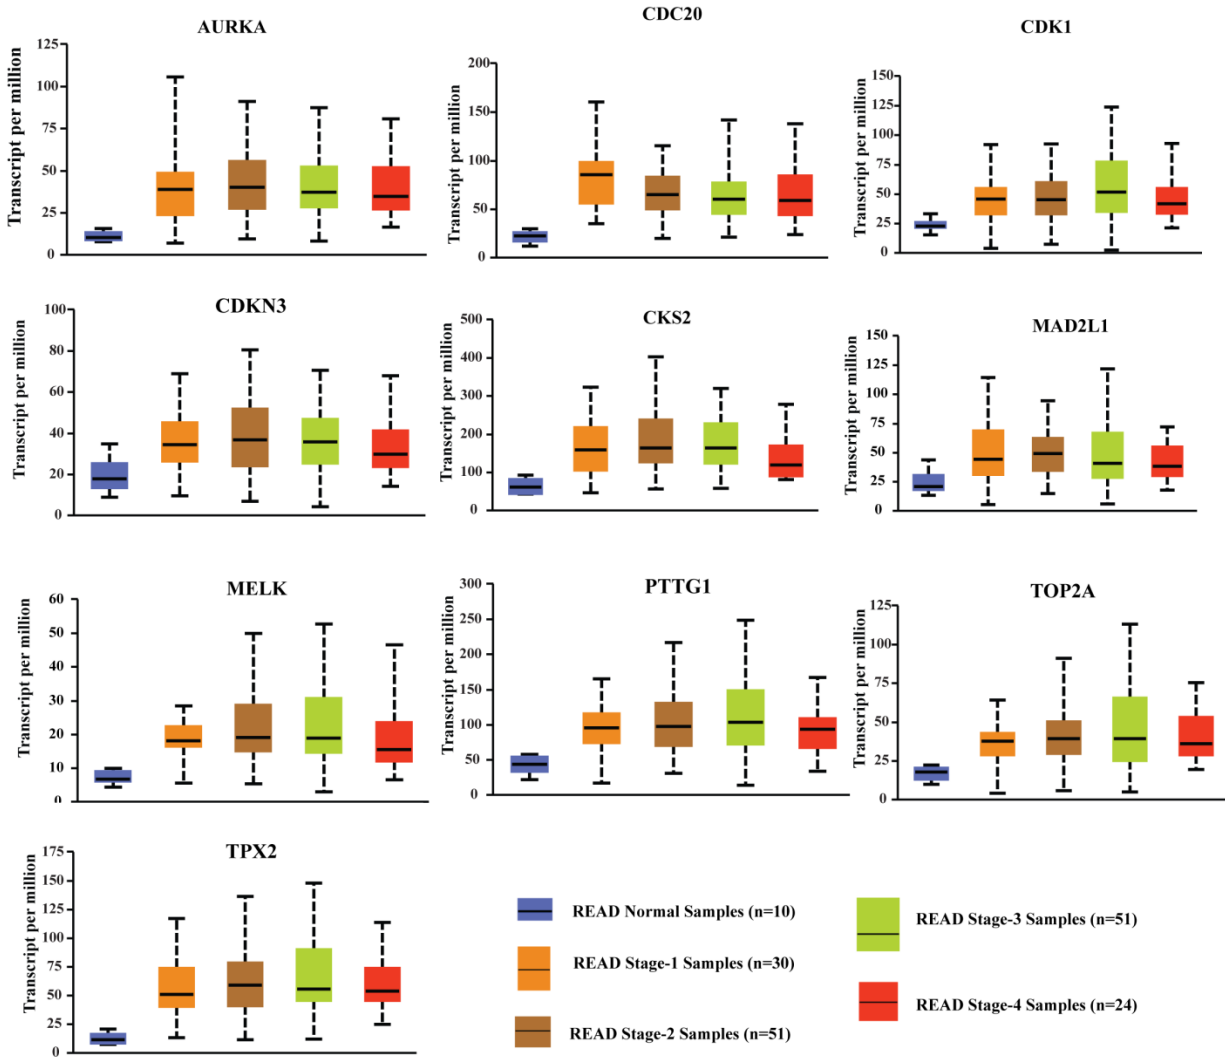

**Figure S1.** Box plots for the expressions of KGs with different stages (Stage 1, Stage 2, Stage 3, and Stage 4) of READ (Rectal adenocarcinoma) including the control stage in TCGA database.

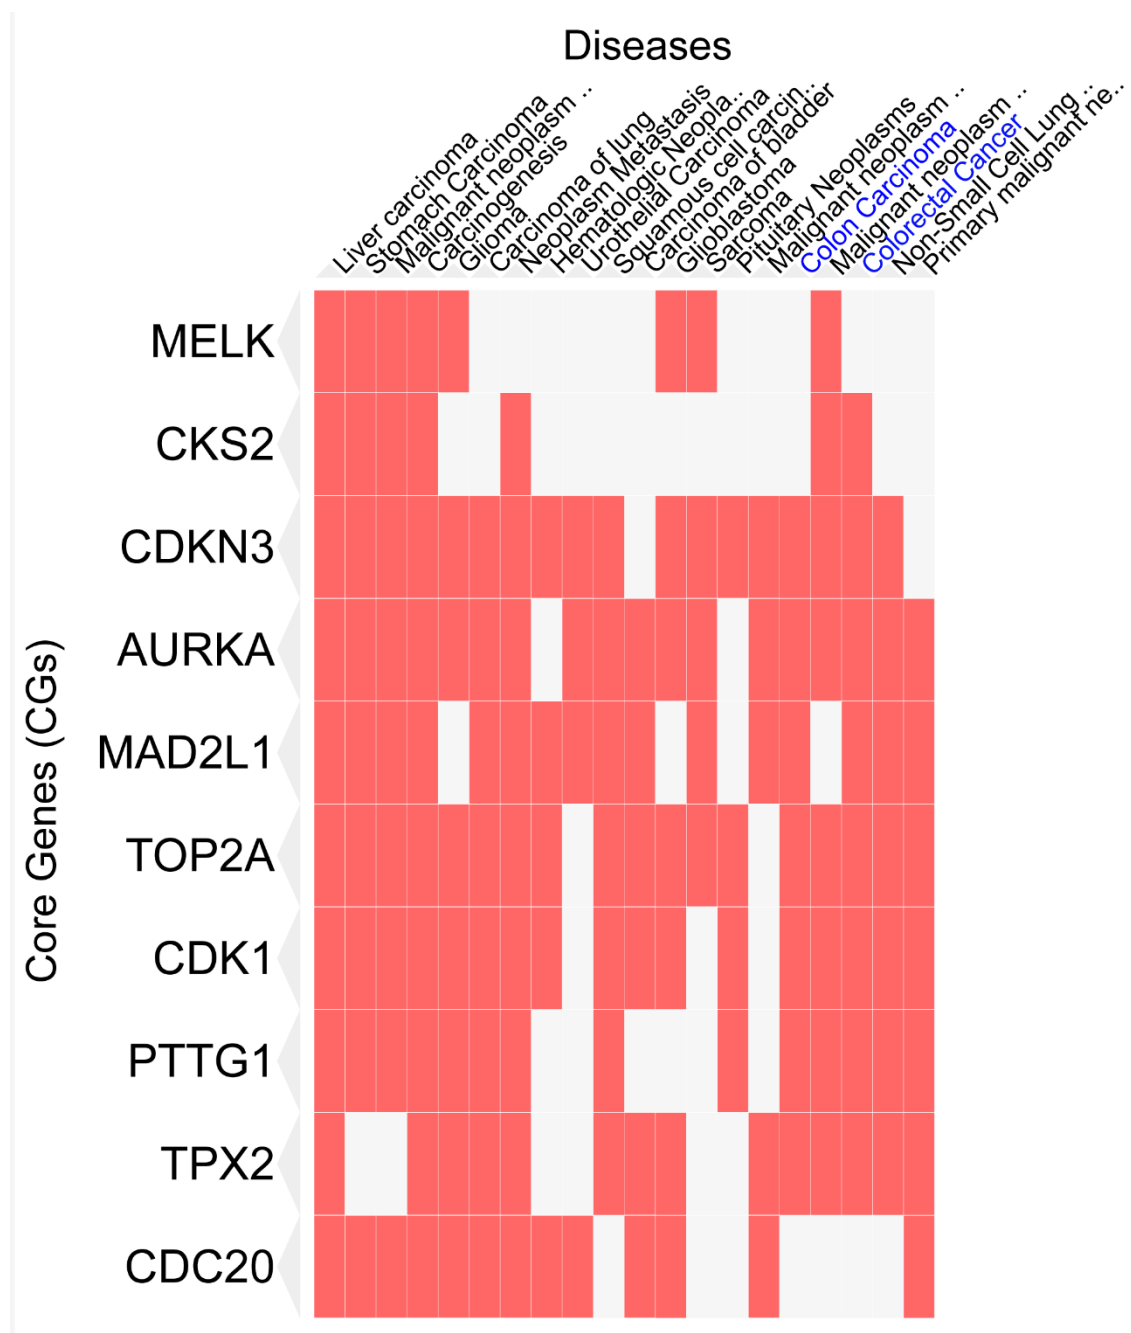

**Figure S2.** Core genes-set enrichment analysis with different diseases

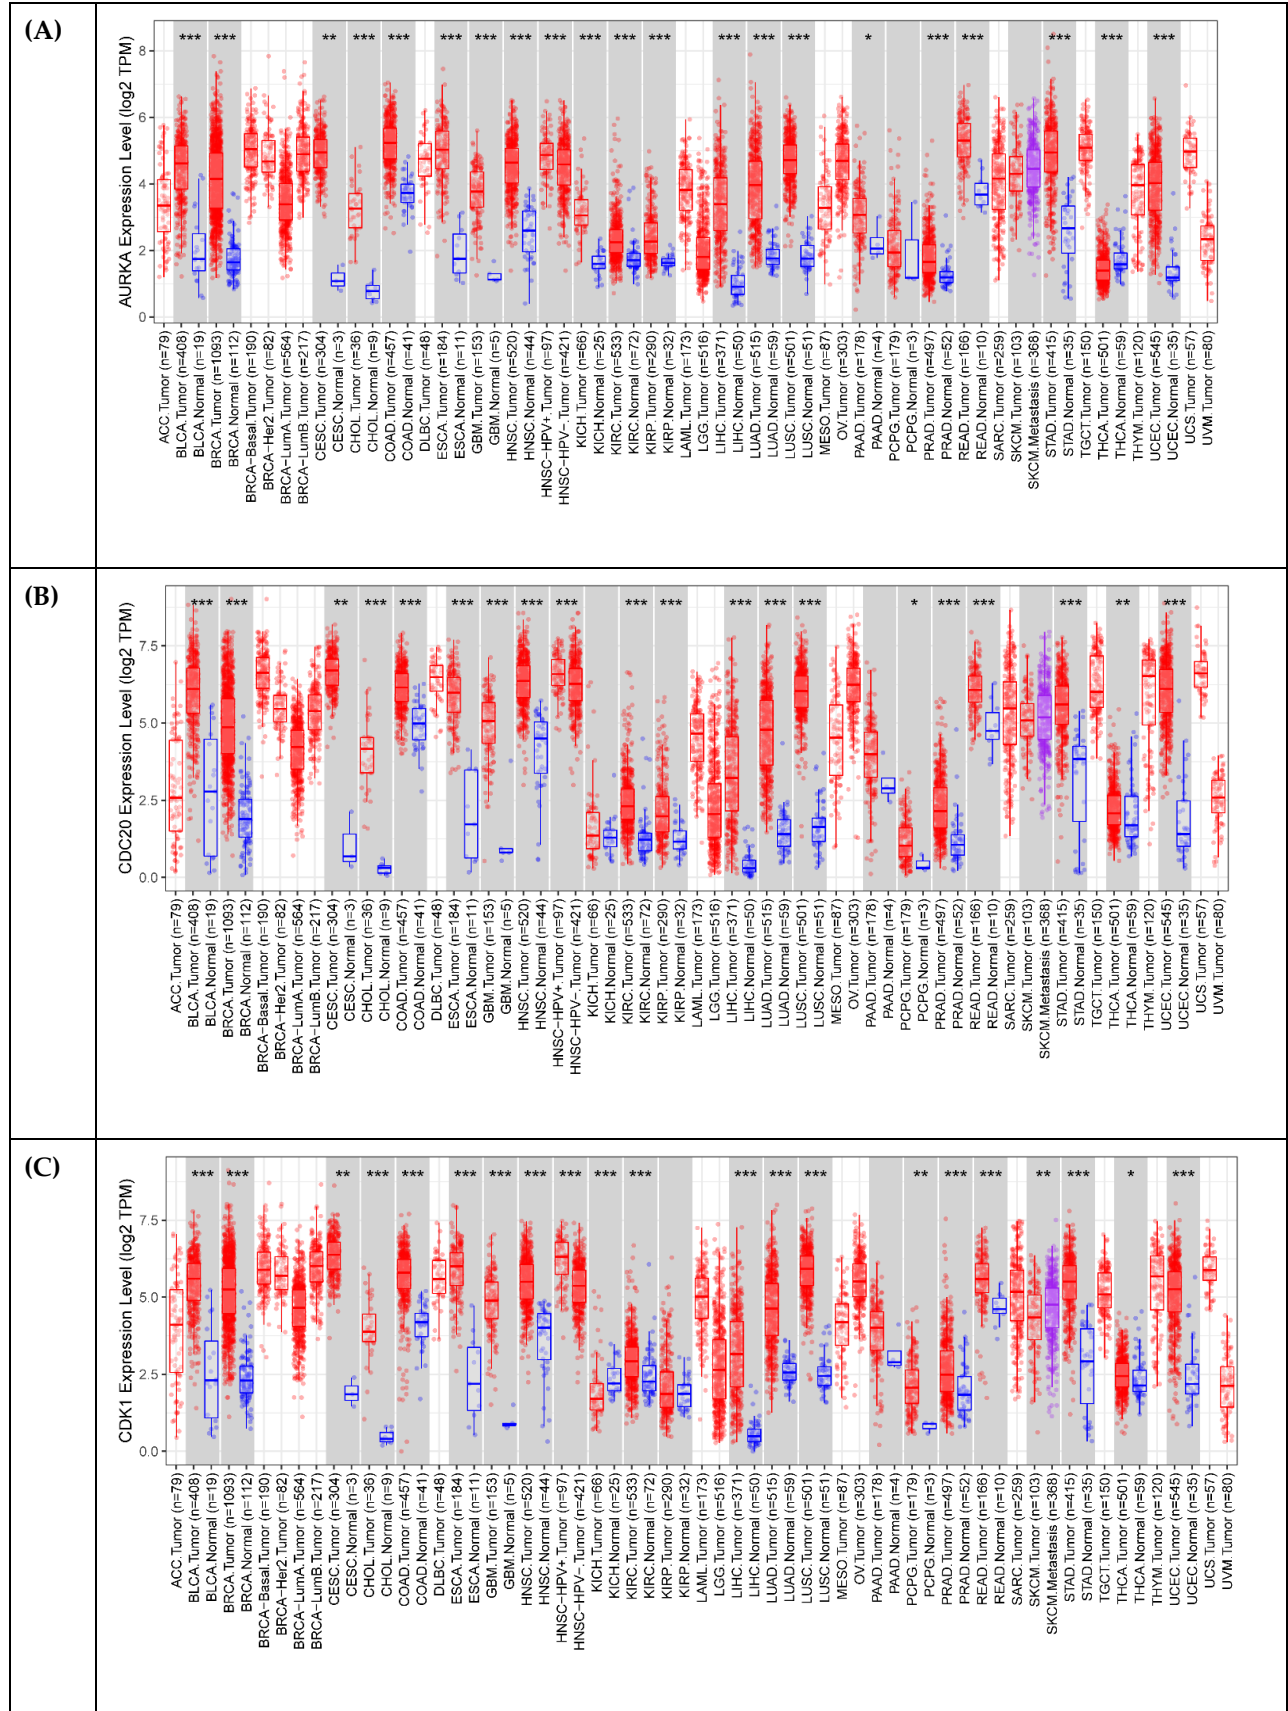

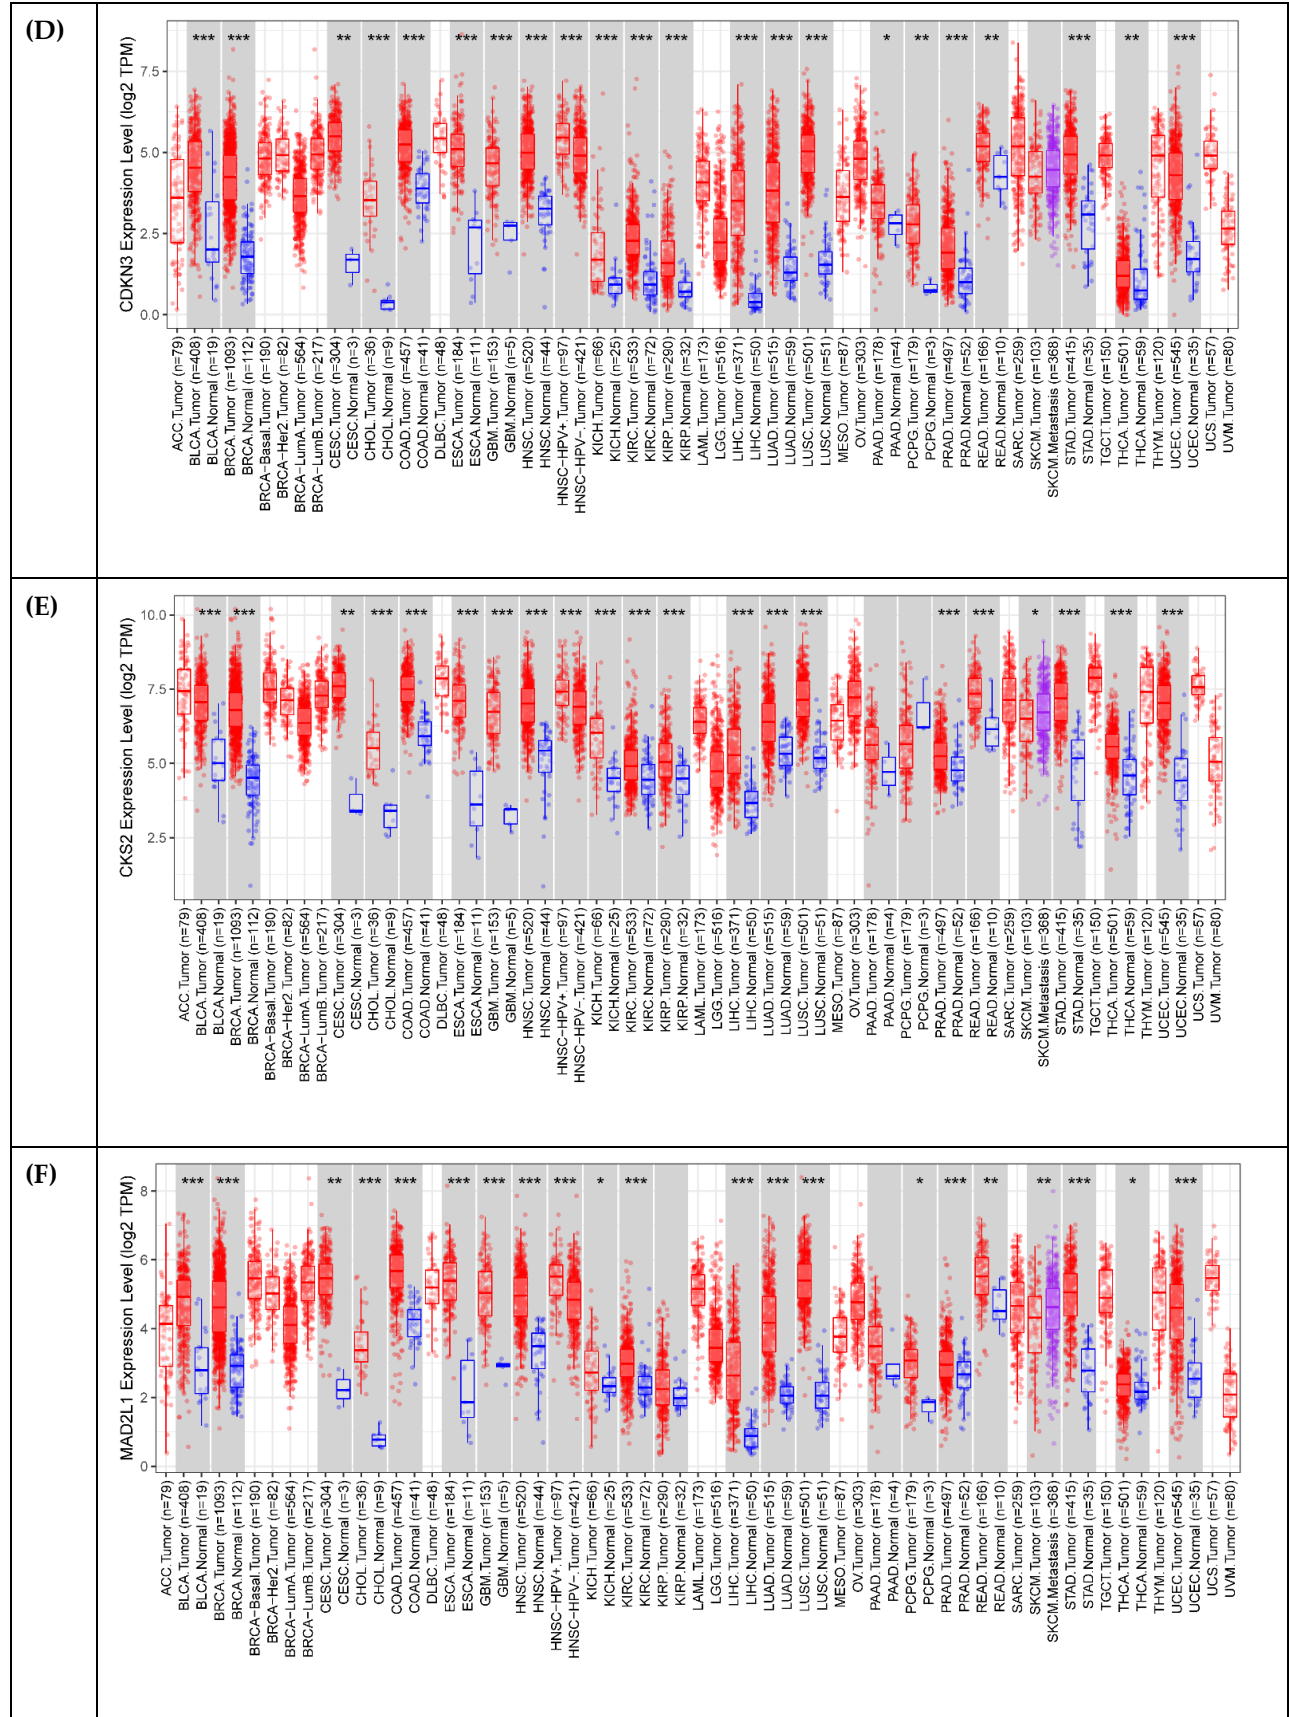

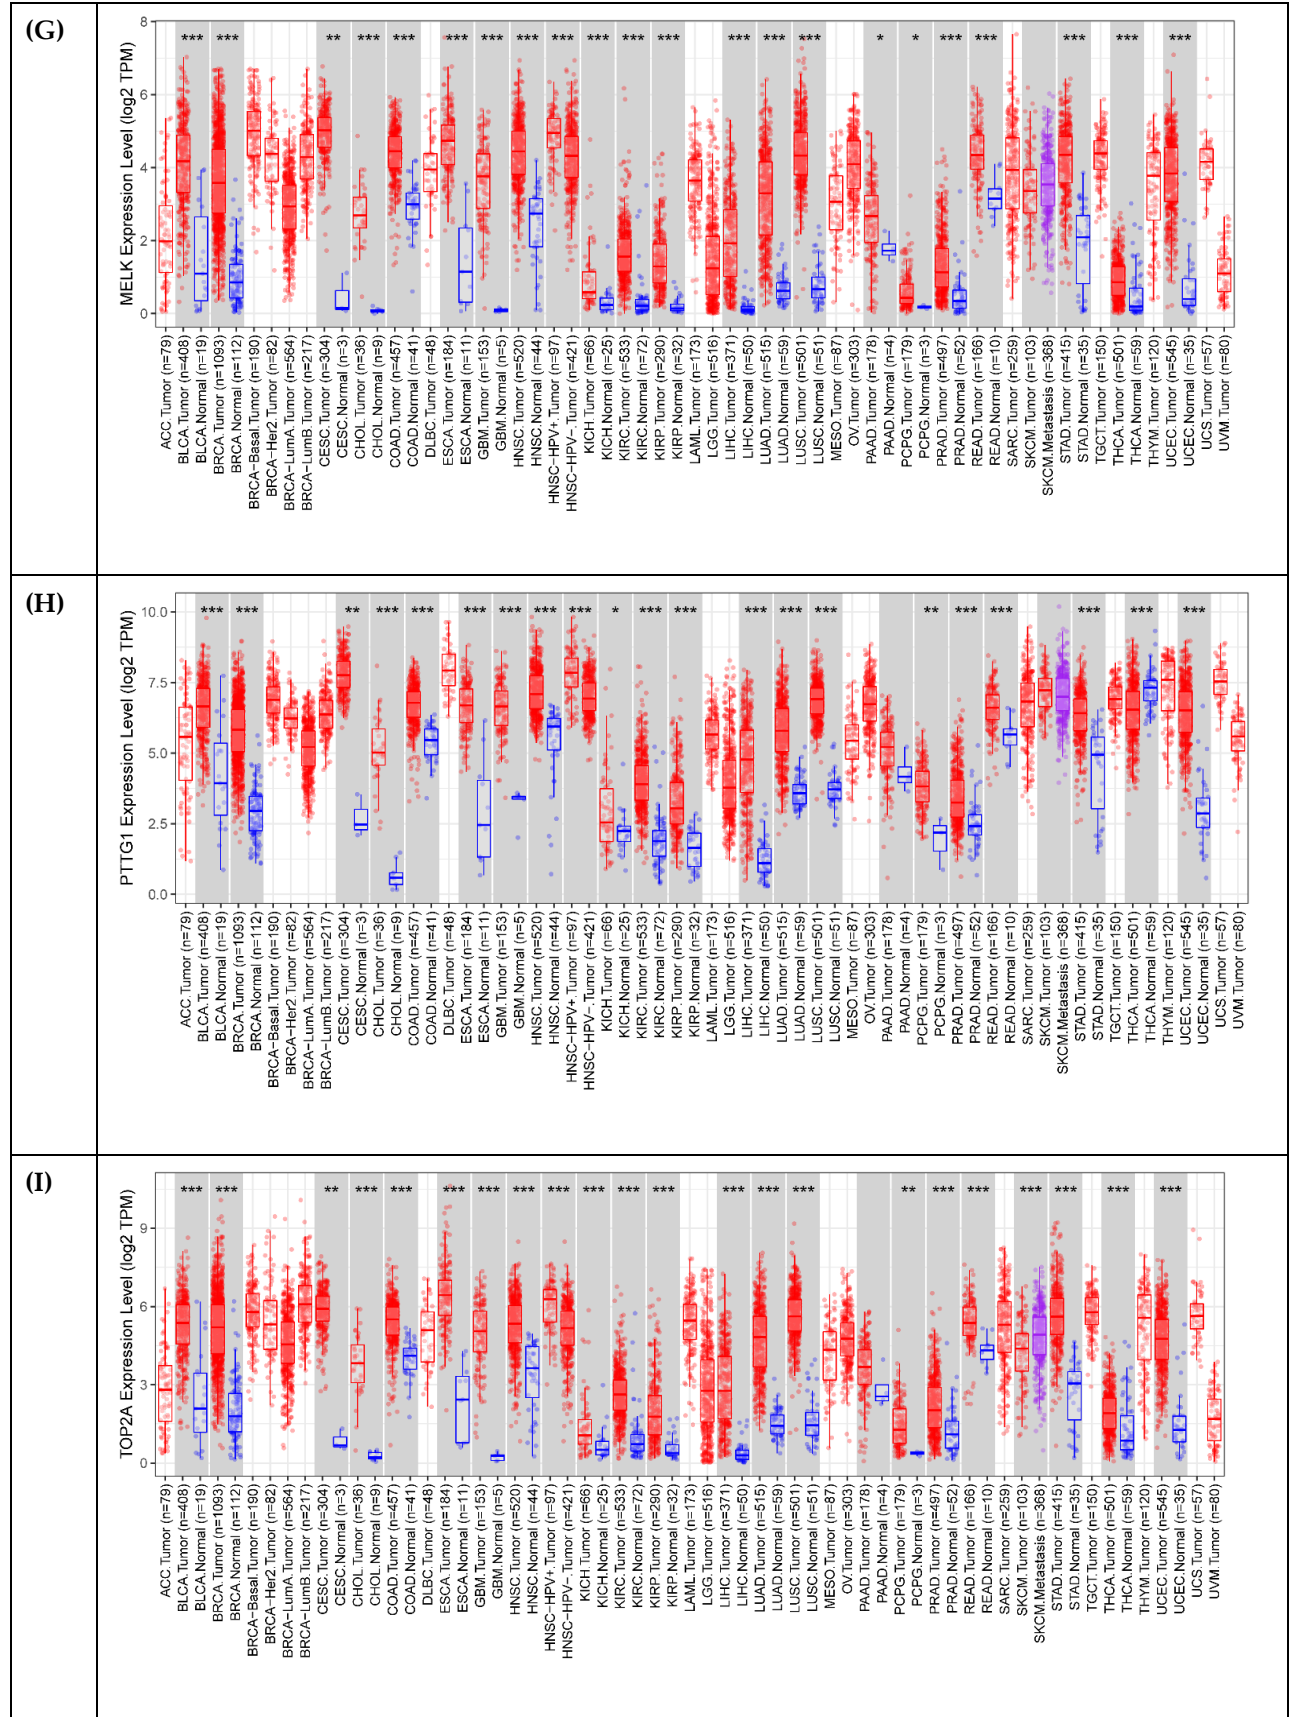



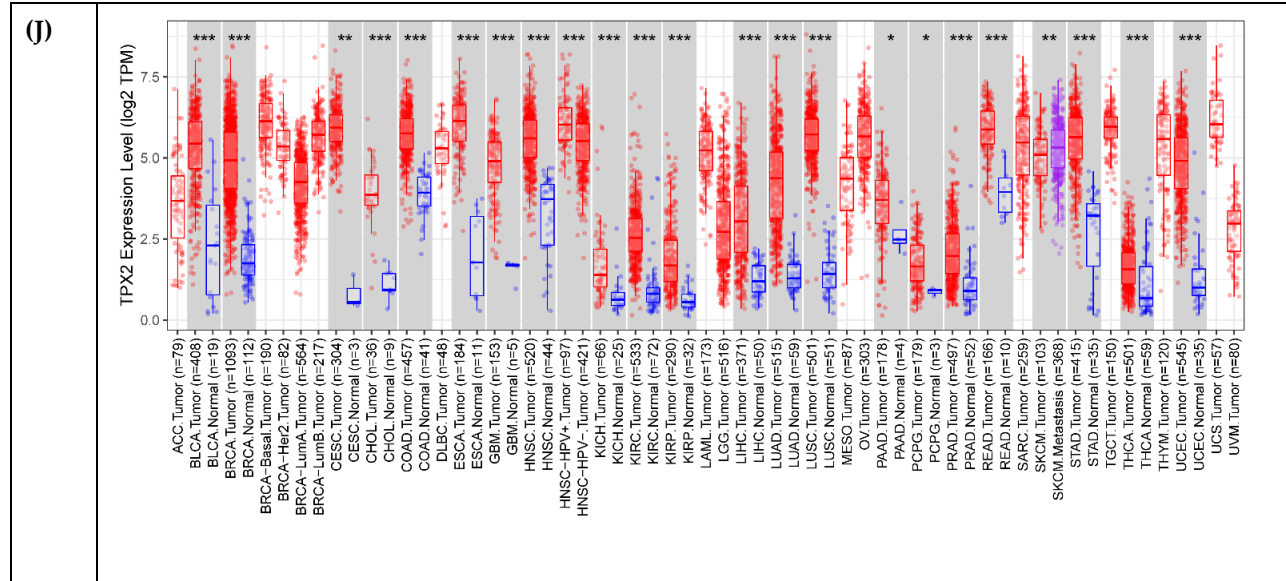

**Figure S3:** Pan-cancer analysis of core genes (A) AURKA, (B) CDC20, (C) CDK1, (D) CDKN3, (E) CKS2, (F) MAD2L1, (G) MELK, (H) PTTG1, (I) TOP2A, (J) TPX2

**Table S1:** Transcriptome-guided 158 meta-drug agents associated with CRC infections collected from DSigDB online database.

| Source    | Drug                                                                                                                                                                                                                                                                                                                                                                                                                                                                                                                                                                                                                                                                                                                                                                                                                                                                                                                                                                                                                                                                                                                                                                                                                                                                                                                                                                                                                                                                                                                                                                                                                                                                                                                                                                                                                                                                                                                                                                                                                                                                                                                                                                                                                                            |
|-----------|-------------------------------------------------------------------------------------------------------------------------------------------------------------------------------------------------------------------------------------------------------------------------------------------------------------------------------------------------------------------------------------------------------------------------------------------------------------------------------------------------------------------------------------------------------------------------------------------------------------------------------------------------------------------------------------------------------------------------------------------------------------------------------------------------------------------------------------------------------------------------------------------------------------------------------------------------------------------------------------------------------------------------------------------------------------------------------------------------------------------------------------------------------------------------------------------------------------------------------------------------------------------------------------------------------------------------------------------------------------------------------------------------------------------------------------------------------------------------------------------------------------------------------------------------------------------------------------------------------------------------------------------------------------------------------------------------------------------------------------------------------------------------------------------------------------------------------------------------------------------------------------------------------------------------------------------------------------------------------------------------------------------------------------------------------------------------------------------------------------------------------------------------------------------------------------------------------------------------------------------------|
| DSigDB[1] | Manzamine A, Cardidigin, Staurosporine, Sitosterol, Benzo.a.pyrene, Nocardiopsis Sp, Riccardin D, Troglitazone, Irinotecan Hydrochloride, Masitinib, Peiminine, Irinotecan, Maslinic Acid, Etoposide, Nortopsentin A, Epigallocatechin Gallate, Procyanidin, Regorafenib, Foretinib, Simvastatin, Hederagenin, AZD4547, Quercitrin, JAK 3 Inhibitor, Caulerpin, AFLATOXIN, Doxorubicin, Ellipticine, Paclitaxel, Calcitriol, COUMESTROL, Lobelin, Luteolin, Methotrexate, Calcium.Folate, Enterolactone, Peridinin, Cdk.12.Inhibitor, Icariin, Astaxanthin, OTSSP167, STL264925, CP466722, Dasatinib, Quercetin, Nintedanib, SB 202190, Bicalutamide, Belinostat, Indirubin Derivative, Sipholenol L, Chlortetracycline, Sipholenol A, Vinblastine, ChEMBL35349, Capecitabine, Deoxyelephantopin, Fulvestrant, Milnamide D, Candidaspongiolide B, IPA3, Physcion, Docetaxel, Thapsigargin, Estradiol, Genistein, Binimetinib, Piroxicam, Thalidomide, Siphonenone A, Yuanhuacine, Sexangularetin, Cobimetinib, Danazol, Fucoxanthin, PKR Inhibitor, Andrographolide, Progesterone, Gambogic Acid, Curcumin, Violaxanthin, Resveratrol, Trifluridine, Kahweol, Curcumin, Testosterone, Encorafenib, Trichostatin A, Indigocarpan, Resveratrol, Trifluridine, Cyclosporin A, Goniothalamine, Gingerol, BI D1870, Candidaspongiolide A, Renieramycin M, Cardamonin, Candidaspongiolide Core, PhIP, Gliotoxin, Dronabinol, Gefitinib, Leptomycin, BX795, MG132, Bisphenol.A, Monobenzene, Oxymatrine, Isoledene, Retinoic.Acid, Okadaic.Acid, Salternamide.A, Ciclopirox, LUCANTHONE, Hyoscyamine, ZINC214489228, MeIQx, Clindamycin, Zerumbone, Esculetin, Deferoxamine, Tripolinolate A, Thioguanosine, Fluorouracil.Deoxyriboside, Vorinostat, Thymoquinone, Uracil, Fluorouracil Mononitrate, Mertensene, Levamisole, Phorbol 12 Myristate 13 Acetate, Methylcholine, Dmnq, Cuminaldehyde, Fluorouracil, Diaminocyclohexane, Sulforaphane, Methyl.Ferulate, Tegafur, Azacytidine, Tipiracil, Dihydrouracil, Pyrazolo 34D Pyrimidine, Dihydrotegafur, Pentanone, Cardol, Oplopantriol A, Ethoxy 5 Fluorouracil, Bromoisatin, Oxalic Acid, Cadmium Acetate, Decitabine, Fucoidan.Alaria, Hydrogen.Peroxide, MERCURY, Nickel, Tetrachloroethylene. |



**Table S2:** The list of top 20 significantly (p-value<0.05) comorbidities associated with CGs

| Disease                            | Adjusted P-value | Core genes (CGs)                                         |
|------------------------------------|------------------|----------------------------------------------------------|
| Liver carcinoma                    | 5.86E-06         | TOP2A;CDC20;TPX2;MELK;PTTG1;CDK1;CKS2;AURKA;CDKN3;MAD2L1 |
| Stomach Carcinoma                  | 5.86E-06         | TOP2A;CDC20;MELK;PTTG1;CDK1;CKS2;AURKA;CDKN3;MAD2L1      |
| Malignant neoplasm of stomach      | 5.86E-06         | TOP2A;CDC20;MELK;PTTG1;CDK1;CKS2;AURKA;CDKN3;MAD2L1      |
| Carcinogenesis                     | 1.16E-05         | TOP2A;CDC20;TPX2;MELK;PTTG1;CDK1;CKS2;AURKA;CDKN3;MAD2L1 |
| Glioma                             | 6.30E-05         | TOP2A;CDC20;TPX2;MELK;PTTG1;CDK1;AURKA;CDKN3             |
| Carcinoma of lung                  | 1.27E-04         | TOP2A;CDC20;TPX2;PTTG1;CDK1;AURKA;CDKN3;MAD2L1           |
| Neoplasm Metastasis                | 1.80E-04         | TOP2A;CDC20;TPX2;PTTG1;CDK1;CKS2;AURKA;CDKN3;MAD2L1      |
| Hematologic Neoplasms              | 1.80E-04         | TOP2A;CDC20;CDK1;CDKN3;MAD2L1                            |
| Urothelial Carcinoma               | 2.28E-04         | CDC20;AURKA;CDKN3;MAD2L1                                 |
| Squamous cell carcinoma            | 2.29E-04         | TOP2A;TPX2;PTTG1;CDK1;AURKA;CDKN3;MAD2L1                 |
| Carcinoma of bladder               | 2.31E-04         | TOP2A;CDC20;TPX2;CDK1;AURKA;MAD2L1                       |
| Glioblastoma                       | 2.37E-04         | TOP2A;CDC20;TPX2;MELK;CDK1;AURKA;CDKN3                   |
| Sarcoma                            | 2.42E-04         | TOP2A;MELK;AURKA;CDKN3;MAD2L1                            |
| Pituitary Neoplasms                | 2.42E-04         | TOP2A;PTTG1;CDK1;CDKN3                                   |
| Malignant neoplasm of esophagus    | 2.42E-04         | CDC20;TPX2;AURKA;CDKN3;MAD2L1                            |
| Colon Carcinoma                    | 2.97E-04         | TOP2A;TPX2;PTTG1;CDK1;AURKA;CDKN3;MAD2L1                 |
| Malignant neoplasm of prostate     | 3.56E-04         | TOP2A;TPX2;MELK;PTTG1;CDK1;CKS2;AURKA;CDKN3              |
| Colorectal Cancer                  | 3.86E-04         | TOP2A;TPX2;PTTG1;CDK1;CKS2;AURKA;CDKN3;MAD2L1            |
| Non-Small Cell Lung Carcinoma      | 4.00E-04         | TOP2A;TPX2;PTTG1;CDK1;AURKA;CDKN3;MAD2L1                 |
| Primary malignant neoplasm of lung | 4.10E-04         | TOP2A;CDC20;TPX2;PTTG1;CDK1;AURKA;MAD2L1                 |

## References

1. Yoo M, Shin J, Kim J, Ryall KA, Lee K, Lee S, et al. DSigDB: Drug signatures database for gene set analysis. *Bioinformatics*. 2015;31.
